# Supplementary material for: Microevolution of Helicobacter pylori during Prolonged Infection of Single Hosts and within Families
Source: PLoS Genet. 2010 Jul 22;6(7):e1001036. doi: 10.1371/journal.pgen.1001036 (PMC2908706; doi:10.1371/journal.pgen.1001036)
Supplement: Table S1 — 78 gene fragments whose sequences were compared between paired isolates and within isolates from families. (0.04 MB XLS) [file pgen.1001036.s003.xls]

## Sheet: table.csv
Table S1. 78 gene fragments whose sequences were compared between paired isolates and within isolates from families
	Size		Positions in genome 26695 of start and end
Gene	Standard	Extended	Standard	Extended	Orientation	Annotated function
HP0012	381	1366	10056..10436	9518..10884	+	DNA primase (dnaG)
HP0013	431	1437	12170..12600	11669..13098	+	argininosuccinate synthase
HP0049	446		48604..49049		+	hypothetical protein
HP0071	585	1278	74750..75334	74100..75377	-	urease accessory protein (ureI)
HP0111	342	1206	119138..119479	118683..119824	+	heat-inducible transcription repressor
HP0142	420	1744	154138..154557	153326..155064	-	A/G-specific adenine glycosylase (mutY)
HP0163	432	1376	171815..172244	171333..172709	-	delta-aminolevulinic acid dehydratase (hemB)
HP0177	410		183801..184210		+	translation elongation factor EF-P (efp)
HP0183	376	1516	190499..190874	189853..191368	+	serine hydroxymethyltransferase (glyA)
HP0190	349	1272	196079..196427	195528..196798	+	phospholipase D-family protein
HP0191	429	1447	197209..197637	196657..198102	+	fumarate reductase, iron-sulfur subunit (frdB)
HP0207	378	1520	212879..213256	212237..213382	+	ATP-binding protein (mpr)
HP0221	429	1474	230057..230485	229577..231043	+	nifU-like protein
HP0226	411	1538	234233..234643	233928..235103	+	conserved hypothetical integral membrane protein
HP0278	447	1441	285710..286156	285251..286691	+	guanosine pentaphosphate phosphohydrolase (gppA)
HP0280	389	1029	288223..288611	287670..288699	+	putative lipid A biosynthesis acyltransferase
HP0283	347	1401	291624..291970	291182..292582	+	3-dehydroquinate synthase (aroB)
HP0285	417	1538	294210..294626	293664..295195	+	conserved hypothetical protein
HP0298	411	1287	316795..317205	316376..317662	+	dipeptide ABC transporter, periplasmic dipeptide-binding protein (dppA)
HP0299	420	1632	317549..317968	316951..318581	+	dipeptide ABC transporter, permease protein (dppB)
HP0300	454	1519	318298..318751	317740..319258	+	dipeptide ABC transporter, permease protein (dppC)
HP0301	376		319257..319632		+	dipeptide ABC transporter, ATP-binding protein (dppD)
HP0319	488	1562	335361..335848	335206..336396	+	arginyl-tRNA synthetase (argS)
HP0321	334	1355	337326..337659	336741..338096	+	5'-guanylate kinase (gmk)
HP0480	387	1419	503114..503494	502562..503981	+	GTP-binding protein, fusA-homolog (yihK)
HP0485	344	1311	508567..508906	508132..509441	+	catalase-like protein
HP0494	452	1388	521342..521793	520798..522174	+	UDP-N-acetylmuramoylalanine-D-glutamate ligase (murD)
HP0499	369	1482	526000..526367	525388..526871	+	phospholipase A1 precursor (DR-phospholipase A)
HP0517	338	1352	544783..545110	544215..545566	+	GTP-binding protein (era)
HP0577	370	1413	607370..607734	606919..608330	+	methylene-tetrahydrofolate dehydrogenase (folD)
HP0581	413	1349	612070..612479	611648..612996	+	dihydroorotase (pyrC)
HP0587	375	1450	619516..619890	618977..620427	+	aminodeoxychorismate lyase (pabC)
HP0613	383	1301	657849..658236	657409..658667	+	ABC transporter, ATP-binding protein
HP0617	356	1543	662235..662590	661607..663149	+	aspartyl-tRNA synthetase (aspS)
HP0620	398		665817..666214		+	inorganic pyrophosphatase (ppa)
HP0638	394	1491	684937..685320	684312..685713	+	outer membrane protein (omp13/hopH)
HP0646	372	1393	692442..692805	691862..693254	+	UDP-glucose pyrophosphorylase (galU)
HP0701	400	1338	754325..754721	753836..755170	+	DNA gyrase, sub A (gyrA)
HP0706	391	954	760460..760850	760056..761000	+	outer membrane protein (omp15/hopE)
HP0723	398	1174	776723..777120	776351..777477	+	L-asparaginase II (ansB)
HP0774	356	1451	827182..827537	826611..828061	+	tyrosyl-tRNA synthetase (tyrS)
HP0796	432	1376	853343..853774	852840..854221	+	outer membrane protein (omp18/horG)
HP0821	349	1334	873470..873818	872998..874321	+	excinuclease ABC subunit C (uvrC)
HP0822	425	1603	875627..876051	874997..876599	+	homoserine dehydrogenase (metL)
HP0834	510		886070..886579		+	GTP-binding protein homologue (yphC)
HP0875	398	1324	926392..926789	925925..927248	+	catalase
HP0950	383	1426	1010852..1011234	1010308..1011733	+	acetyl-CoA carboxylase beta subunit (accD)
HP1043	386	1695	1104785..1105170	1104374..1105801	+	response regulator
HP1100	393	1389	1160736..1161127	1160202..1161590	+	6-phosphogluconate dehydratase
HP1110	350	1550	1171268..1171617	1170579..1172128	+	pyruvate ferredoxin oxidoreductase, alpha subunit
HP1114	417	1517	1175899..1176315	1175360..1176890	+	excinuclease ABC subunit B (uvrB)
HP1132	388	1475	1195161..1195548	1194517..1195990	+	ATP synthase F1, subunit beta (atpD)
HP1134	627		1197138..1197764		-	ATP synthase F1, subunit alpha (atpA)
HP1153	348	1342	1215852..1216199	1215367..1216708	+	valyl-tRNA synthetase (valS)
HP1203	359	1483	1279637..1279995	1279076..1280560	+	transcription termination factor NusG (nusG)
HP1205	410	1391	1280795..1281204	1280246..1281638	+	translation elongation factor EF-Tu (tufB)
HP1206	369	1521	1283809..1284177	1283259..1284778	+	multidrug resistance protein (hetA)
HP1213	357	1399	1289259..1289615	1288653..1290049	+	polynucleotide phosphorylase (pnp)
HP1218	380	1535	1294865..1295240	1294343..1295640	+	glycinamide ribonucleotide synthetase (purD)
HP1238	357	1417	1312340..1312696	1311736..1313153	+	formamidase
HP1265	438	1441	1337234..1337671	1336721..1338142	+	NADH-ubiquinone oxidoreductase chain F
HP1271	342	1449	1343343..1343684	1342786..1344234	+	NADH-ubiquinone oxidoreductase chain L
HP1278	363	1318	1353444..1353806	1352983..1354299	+	tryptophan synthase, beta subunit (trpB)
HP1279	456	1697	1354997..1355449	1354352..1356048	-	anthranilate isomerase (trpC)
HP1316	356	1390	1378676..1379031	1378116..1379505	+	ribosomal protein L2 (rpl2)
HP1321	384	1352	1381515..1381898	1381007..1382361	+	conserved hypothetical ATP-binding protein
HP1345	443	1023	1405143..1405585	1404572..1405594	+	phosphoglycerate kinase
HP1355	294	1484	1417330..1417623	1416618..1418094	+	nicotinate-nucleotide pyrophosphorylase (nadC)
HP1363	461	1373	1425210..1425670	1424712..1426089	+	conserved hypothetical integral membrane protein
HP1380	344	1427	1445193..1445528	1444761..1445742	+	prephenate dehydrogenase (tyrA)
HP1416	306	1387	1485931..1486236	1485355..1486741	+	lipopolysaccharide 1,2-glucosyltransferase (rfaJ)
HP1466	338	1463	1536931..1537268	1536367..1537829	+	conserved hypothetical integral membrane protein
HP1494	387	1574	1567828..1568214	1567260..1568834	+	UDP-MurNac-tripeptide synthetase (murE)
HP1498	402		1570958..1571359		+	hypothetical protein
HP1512	436	1453	1586061..1586496	1585517..1586953	+	iron-regulated outer membrane protein (frpB)
HP1549	384	1333	1628695..1629078	1628194..1629509	+	protein-export membrane protein (secF)
HP1553	478	1398	1633789..1634266	1633289..1634686	+	ATP-dependent nuclease subunit A
HP1577	362	1500	1656857..1657218	1656218..1657253	+	ABC transporter, permease protein (yaeE)
Minimum	294	954
Maximum	627	1744
Average	397.564	1416.7
Total for all gene fragments per strain
Minimum		30775
Maximum		60464
Average		39931
