# Supplementary material for: Microevolution of Helicobacter pylori during Prolonged Infection of Single Hosts and within Families
Source: PLoS Genet. 2010 Jul 22;6(7):e1001036. doi: 10.1371/journal.pgen.1001036 (PMC2908706; doi:10.1371/journal.pgen.1001036)
Supplement: Table S2 — (A) Paired serial isolates from 34 individuals. (B) Single isolates from 29 individuals in 10 families. (0.03 MB XLS) [file pgen.1001036.s004.xls]

## Sheet: Sheet1
Table S2A. Paired serial isolates from 34 individuals
Key	GroupNr	Strain Name	Country	Age	Gender	Region	ST	TimeDiffYears	Year of Isolation
529	1	LSU1010-1	USA	38	F	Louisiana, USA	200	0	1980's
530	1	LSU1010-3	USA			Louisiana, USA	200	0.25	1980's
546	2	LSU1013-2	USA	49	F	Louisiana, USA	202	0	1980's
547	2	LSU1013-6	USA			Louisiana, USA	202	1.9	1980's
561	3	LSU1014-1	USA	69	F	Louisiana, USA	203	0	1980's
562	3	LSU1014-6	USA			Louisiana, USA	203	2	1980's
548	4	LSU1016-1	USA	37	F	Louisiana, USA	207	0	1980's
549	4	LSU1016-5	USA			Louisiana, USA	207	1	1980's
565	5	LSU1021-6	USA	68	M	Louisiana, USA	464	0	1980's
566	5	LSU1021-7	USA			Louisiana, USA	208	1	1980's
559	6	LSU1027-1	USA	55	F	Louisiana, USA	209	0	1980's
560	6	LSU1027-3	USA			Louisiana, USA	209	0.25	1980's
818	7	LSU1037-1	USA	53	F	Louisiana, USA	205	0	1980's
819	7	LSU1037-5	USA			Louisiana, USA	465	1	1980's
563	8	LSU1040-1	USA	35	F	Louisiana, USA	201	0	1980's
564	8	LSU1040-6	USA			Louisiana, USA	463	2	1980's
1061	9	LSU1054-1	USA	47	M	Louisiana, USA	210	0	1980's
1062	9	LSU1054-5	USA			Louisiana, USA	210	1	1980's
1063	10	LSU1062-1	USA	27	M	Louisiana, USA	211	0	1980's
1064	10	LSU1062-3	USA			Louisiana, USA	439	0.25	1980's
820	11	LSU1067-1	USA	52	F	Louisiana, USA	212	0	1980's
821	11	LSU1067-5	USA			Louisiana, USA	212	1	1980's
822	12	LSU1074-1	USA	28	F	Louisiana, USA	213	0	1980's
823	12	LSU1074-4	USA			Louisiana, USA	213	0.5	1980's
816	13	LSU2002-1	USA	54	F	Louisiana, USA	206	0	1980's
817	13	LSU2002-8	USA			Louisiana, USA	206	4	1980's
872	14	LSU2003-1	USA	64	F	Louisiana, USA	214	0	1980's
873	14	LSU2003-7	USA			Louisiana, USA	466	3	1980's
874	15	LSU3001-1	USA	52	F	Louisiana, USA	215	0	1980's
875	15	LSU3001-6	USA			Louisiana, USA	215	2	1980's
1065	16	LSU3005-1	USA	40	M	Louisiana, USA	216	0	1980's
1066	16	LSU3005-4	USA			Louisiana, USA	216	0.5	1980's
876	17	NQ315	Colombia	47	M	Narino, Colombia	221	0	1991
877	17	NQ1712	Colombia			Narino, Colombia	467	3	1994
878	18	NQ331	Colombia			Narino, Colombia	222	0	1991
879	18	NQ1832	Colombia			Narino, Colombia	222	3	1994
882	19	NQ366	Colombia			Narino, Colombia	228	0	1991
883	19	NQ1790	Colombia			Narino, Colombia	228	3	1994
884	20	NQ367	Colombia	38	F	Narino, Colombia	470	0	1991
885	20	NQ1671	Colombia			Narino, Colombia	471	3	1994
886	21	NQ372	Colombia			Narino, Colombia	226	0	1991
887	21	NQ1886	Colombia			Narino, Colombia	472	3	1994
888	22	NQ392	Colombia	36	F	Narino, Colombia	473	0	1991
889	22	NQ1707	Colombia			Narino, Colombia	473	3	1994
1534	33	KUS10A	Netherlands	84	M	Netherlands	458	0	1985-1987
1536	33	KUS10B	Netherlands		M	Netherlands	458	10.2	1994-1995
1538	34	KUS11A	Netherlands	41	M	Netherlands	459	0	1985-1987
1540	34	KUS11B	Netherlands		M	Netherlands	459	7.8	1994-1995
1542	35	KUS12A	Netherlands	47	F	Netherlands	460	0	1985-1987
1544	35	KUS12B	Netherlands		F	Netherlands	461	9	1994-1995
1546	36	KUS13A	Netherlands	46	M	Netherlands	462	0	1985-1987
1548	36	KUS13B	Netherlands			Netherlands	462	7.4	1994-1995
1498	37	KUS1A	Netherlands	65		Netherlands	442	0	1985-1987
1500	37	KUS1B	Netherlands			Netherlands	443	8.8	1994-1995
1506	38	KUS3A	Netherlands	74		Netherlands	446	0	1985-1987
1508	38	KUS3B	Netherlands			Netherlands	447	7.9	1994-1995
1510	39	KUS4A	Netherlands	57		Netherlands	448	0	1985-1987
1512	39	KUS4B	Netherlands			Netherlands	449	8.7	1994-1995
1514	40	KUS5A	Netherlands	29		Netherlands	450	0	1985-1987
1516	40	KUS5B	Netherlands			Netherlands	451	7	1994-1995
1518	41	KUS6A	Netherlands	35		Netherlands	452	0	1985-1987
1520	41	KUS6B	Netherlands			Netherlands	452	8.1	1994-1995
1522	42	KUS7A	Netherlands	49		Netherlands	453	0	1985-1987
1524	42	KUS7B	Netherlands			Netherlands	454	7	1994-1995
1526	43	KUS8A	Netherlands	61		Netherlands	455	0	1985-1987
1528	43	KUS8B	Netherlands			Netherlands	455	9.8	1994-1995
1530	44	KUS9A	Netherlands	64		Netherlands	456	0	1985-1987
1532	44	KUS9B	Netherlands			Netherlands	457	8.8	1994-1995
Table S2B. Single isolates from 29 individuals in 10 families
Key	GroupNr	Strain Name	Country	Age	Gender	Relationship	Region	ST	Year of Isolation
347	23	C6-1	Colombia	45	F	daughter	Bogota, Colombia	548	1996
344	23	C6	Colombia	77	F	Mother	Bogota, Colombia	547	1996
459	24	K1-1	Korea	33	F	daughter	Seoul, Korea	557	1996
456	24	K1	Korea	67	F	Mother	Seoul, Korea	557	1996
868	25	H3022	UK	10	M	Child	Northern Ireland	597	1991
870	25	H3023	UK	34	M	Father	Northern Ireland	597	1991
448	26	K5-2	Korea	23	M	Son	Seoul, Korea	555	1996
487	26	K5-3	Korea	25	F	daughter	Seoul, Korea	555	1996
490	26	K5-1	Korea	31	M	Son	Seoul, Korea	559	1996
496	26	K5	Korea	56	M	Father	Seoul, Korea	560	1996
450	27	C7-3	Colombia	33	F	daughter	Bogota, Colombia	556	1997
422	27	C7-1	Colombia	35	F	daughter	Bogota, Colombia	552	1997
503	28	H2-1	USA	60	F	sister	Houston, TX, USA	536	1996
315	28	H2-3	USA	78	M	brother	Houston, TX, USA	541	1996
311	28	H2-2	USA	70	M	brother	Houston, TX, USA	540	1996
304	28	H2	USA	73	M	Father	Houston, TX, USA	536	1995
340	29	C5-4	Colombia	28	M	Son	Bogota, Colombia	546	1995
336	29	C5-3	Colombia	30	M	Son	Bogota, Colombia	546	1995
335	29	C5-2	Colombia	32	F	daughter	Bogota, Colombia	545	1995
866	30	H3018	UK	18	M	Child	Coventry, UK	594	1991
864	30	H3017	UK	50	M	Uncle	Coventry, UK	596	1991
860	30	H3014	UK	71	M	Grandfather	Coventry, UK	594	1991
383	31	K3-1	Korea	32	M	Son	Seoul, Korea	551	1996
387	31	K3-2	Korea	36	F	daughter	Seoul, Korea	551	1996
550	31	K3-3	Korea	38	F	daughter	Seoul, Korea	562	1996
553	31	K3-4	Korea	46	F	daughter	Seoul, Korea	551	1996
556	31	K3-5	Korea	48	M	Son	Seoul, Korea	563	1996
493	32	C7-2	Colombia	37	F	daughter	Bogota, Colombia	558	1997
484	32	C7	Colombia	74	M	Father	Bogota, Colombia	558	1997
